# Supplementary material for: Fungal Ku prevents permanent cell cycle arrest by suppressing DNA damage signaling at telomeres
Source: PubMed Central journal article supplement — Nucleic Acids Res. 2015 Feb 4;43(4):2138–51. doi: 10.1093/nar/gkv082 (PMC4344518; doi:10.1093/nar/gkv082), 2015-02-04
Supplement: supp_gkv082_nar-02306-d-2014-File009.pdf [file supp_gkv082_nar-02306-d-2014-File009.pdf]

## **Supplemental Information**

**Ku prevents permanent cell cycle arrest in *Ustilago maydis* by suppressing DNA damage signaling at telomeres**

**Carmen de Sena-Tomás, Eun Young Yu, Arturo Calzada, William K. Holloman, Neal F. Lue and José Pérez-Martín**

## SUPPLEMENTARY FIGURES

Figure S1

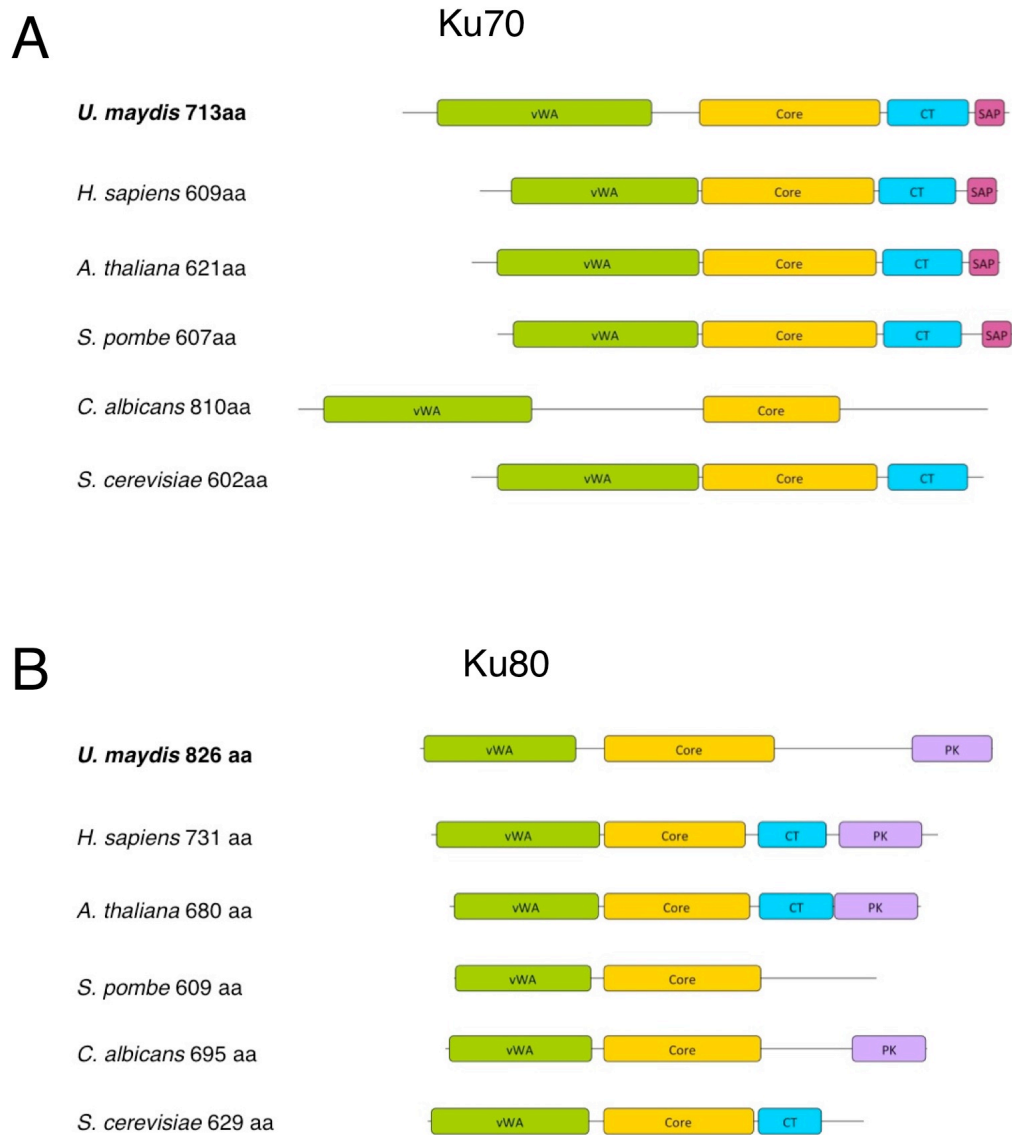

**Figure S1. *U. maydis* Ku70 and Ku80 proteins.**

A and B. The sizes and domain structures of Ku70 and Ku80 homologues in *U. maydis* and other species.

*U. maydis* Ku70 and Ku80 homologues were identified through a homology search using the BLAST program. Ku70 and Ku80 homologues in *S. cerevisiae*

and *S. pombe* were used as the queries. The search was done on the *U. maydis* database at the Munich Information Center for Protein Sequences, and subsequently the results were confirmed by performing a BLAST at the NCBI website (<http://blast.ncbi.nlm.nih.gov/Blast.cgi>). The best hits from these searches were two loci that had previously been manually annotated as um05148 and um05756. Um05148 codes for a 713 amino acids protein with a predicted molecular weight of around 80 kD. Um05756 codes for a protein of 826 amino acids with a predicted molecular weight of around 92 kDa. Ku70 and Ku80 from different species share three common domains but possess distinct C-terminal domains. The shared domains are a N-terminal  $\alpha/\beta$  domain or von Willebrand A domain (vWA) that is thought to be a protein-protein interaction site that binds to other repair factors; a central core (comprised of  $\beta$ -barrel) domain with a DNA binding activity that is dependent on heterodimer formation (Core); and a helical C-terminal arm which embraces the other subunit's core domain (CT) (1, 2). In some eukaryotes, Ku70 contains a SAP domain at the carboxy-terminus, named after three proteins containing this motif (SAF-A/B, Acinus and PIAS), which has been proposed to be a DNA binding domain (3). However, this domain is dispensable for the DNA-binding activity of the heterodimer. Alternatively, a role for SAP in pausing Ku at specific DNA sequences has been proposed. Some Ku80 homologs contain a carboxy-terminal extension that may bind the DNA-dependent protein kinase catalytic subunit (PK) (4).

1. Walker, J.R., Corpina, R.A., and Goldberg, J. (2001). Structure of the Ku heterodimer bound to DNA and its implications for double-strand break repair. *Nature* **412**, 607-614.
2. Wang, J., Dong, X., and Reeves, W.H. (1998). A model for Ku heterodimer assembly and interaction with DNA. Implications for the function of Ku antigen. *J Biol Chem* **273**, 31068-31074.
3. Aravind, L., and Koonin, E.V. (2000). SAP - a putative DNA-binding motif involved in chromosomal organization. *Trends Biochem Sci* **25**, 112-114.

4. Harris, R., Esposito, D., Sankar, A., Maman, J.D., Hinks, J.A., Pearl, L.H., and Driscoll, P.C. (2004). The 3D solution structure of the C-terminal region of Ku86 (Ku86CTR). *J Mol Biol* **335**, 573-582.

**Figure S2**

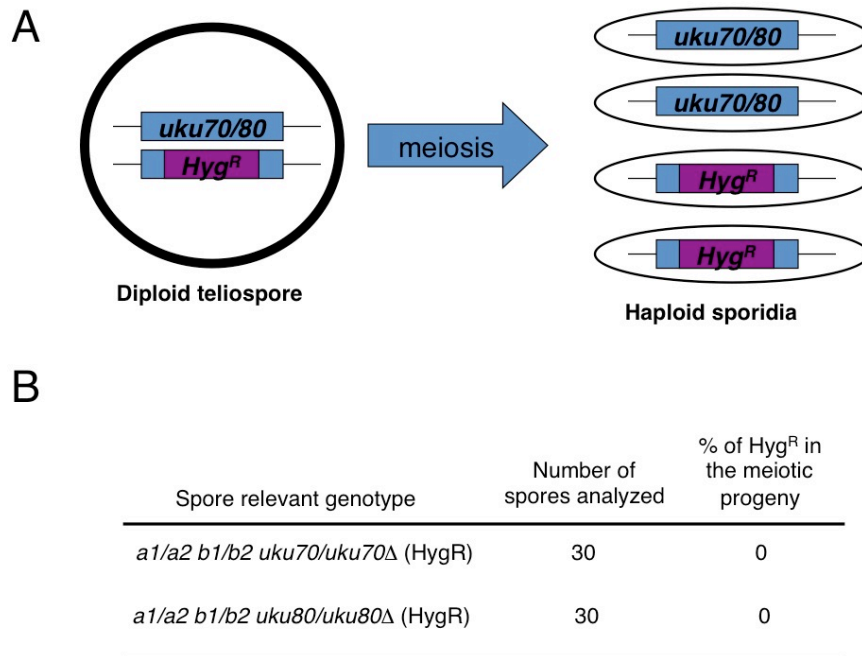

**Figure S2. Meiotic analysis of the essentiality of *uku70* and *uku80* genes.**

A. Scheme of the meiotic analysis in *U. maydis*. In the diploid strain FBD11, one of the two alleles of either *uku70* or *uku80* genes was disrupted and replaced with the hygromycin resistance cassette. These mutant strains were used to infect corn plants and the final product of the infection, i.e., teliospores were isolated. Teliospores are diploid and during their germination, meiosis is completed and haploid progeny cells are produced.

B. Results from the meiotic analysis. 30 teliospores isolated from corn plants infected with the indicated diploid strains were germinated and the percentage of hygromycin progeny from each was scored. We found no hygromycin resistant cells, indicating that both *uku70* and *uku80* are essential genes.

**Figure S3**

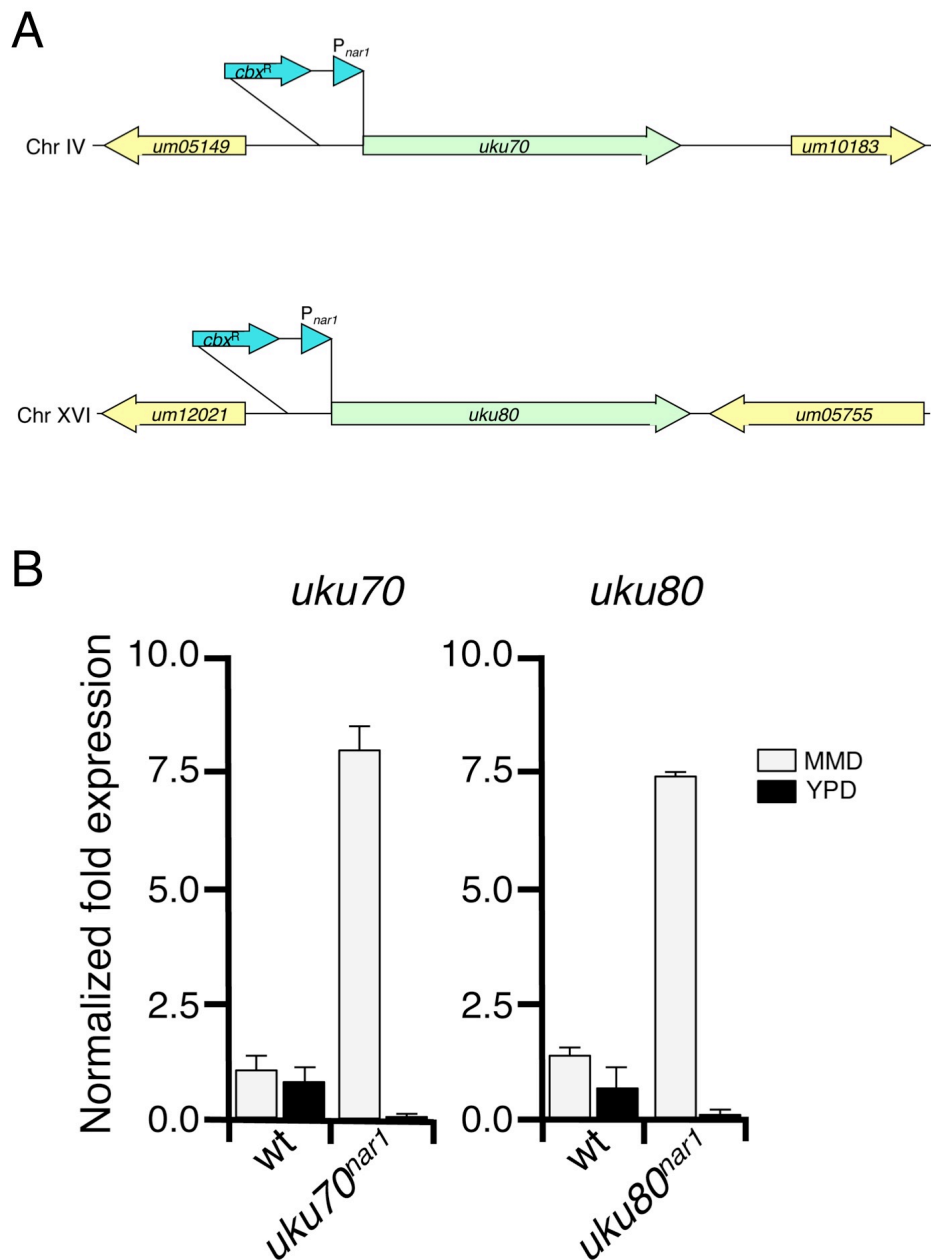

**Figure S3. *uku70<sup>nar1</sup>* and *uku80<sup>nar1</sup>* conditional alleles**

A. Schematics of the genomic structures of the conditional alleles *uku70<sup>nar1</sup>* and *uku80<sup>nar1</sup>*

B. Levels of *uku70* and *uku80* mRNA in the respective conditional strains. The wild type FB1 and conditional strains were grown for 8 hours in permissive

(MMD) or restrictive conditions (YPD). Total RNA was extracted from each strain with acidic phenol solution. After extraction, the RNA was purified using the High Pure RNA Isolation Kit (Roche Diagnostics GmbH). For qRT-PCR, cDNA was synthesized using the High Capacity cDNA Reverse Transcription Kit (Applied Biosystems) employing 1 µg total RNA per sample. qRT-PCR was performed using the SsoAdvanced Universal SYBR Green Supermix (BioRad) in a CFX96 Real-Time PCR system (BioRad). Reaction conditions were as follows: 3 min 95°C followed by 40 cycles of 10 sec 95°C/10 sec 60°C/30 sec 72°C.

**Figure S4**

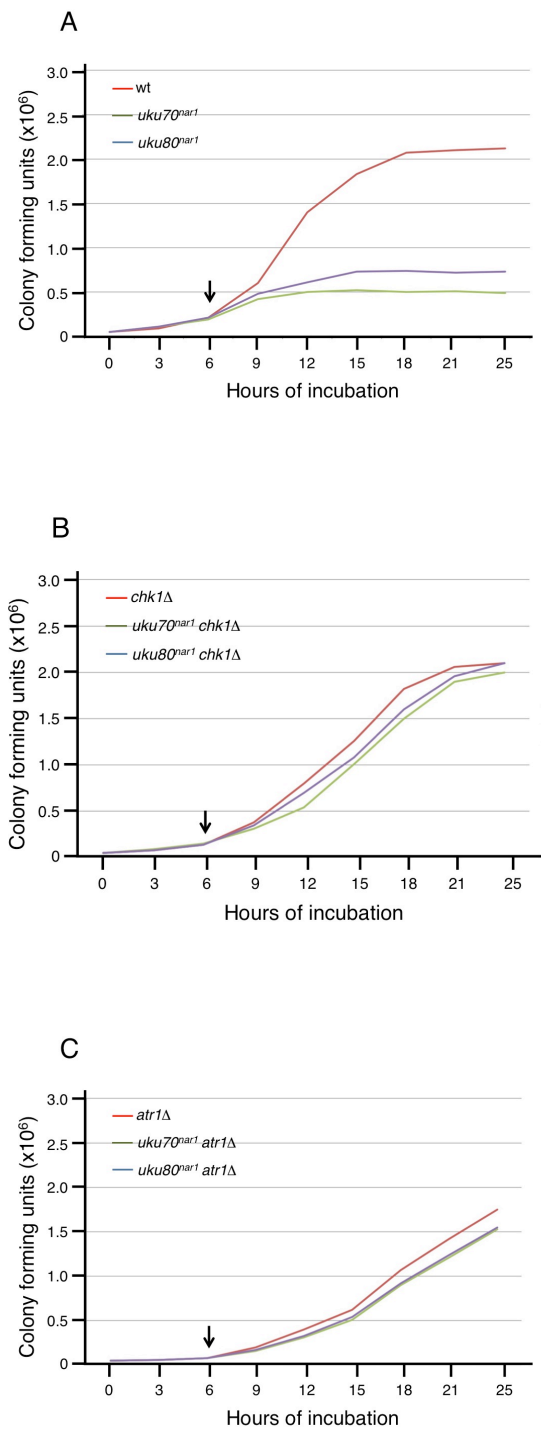

**Figure S4. Disabling the DNA damage response suppressed the requirement of Ku for proliferation of *U. maydis* cells**



A. Growth curves of FB1 (WT), UCS33 (*uku70<sup>nar1</sup>*), and UCS30 (*uku80<sup>nar1</sup>*) in liquid culture. Cells ( $5 \times 10^4$  cells /ml) were grown for 6 hours in MMNO<sub>3</sub> and then switched to YPD medium (repressive conditions for *nar1* expression). Samples of each culture were removed at the indicated time and plated on minimal medium plates to determine the number of viable cells at each time point (colony forming units). Arrow indicates the time point at which cultures were switched to YPD medium.

B. Growth curves for UMP122 (*chk1Δ*), UCS35 (*uku70<sup>nar1</sup> chk1Δ*), and UCS39 (*uku80<sup>nar1</sup> chk1Δ*) were determined as in A and plotted.

C. Growth curves for UCS1 (*atr1Δ*), UCS40 (*uku70<sup>nar1</sup> atr1Δ*), and UCS44 (*uku80<sup>nar1</sup> atr1Δ*) were determined as in A and plotted.

**Figure S5**

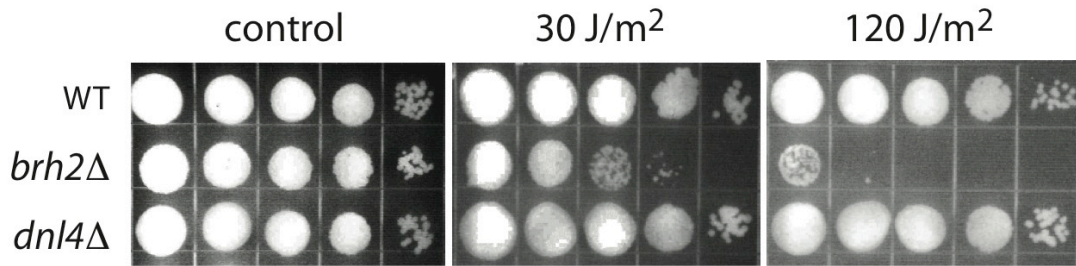

**Figure S5. Ligase IV mutants are not defective in proliferation.**

Control (wt) and ligase IV mutant (*dnl4*Δ) cells were spotted on solid medium and exposed to different doses of UV radiation. A strain carrying a deletion of *brh2*, encoding the BRCA2 homologue of *U. maydis* was used as the positive control.

**Figure S6**

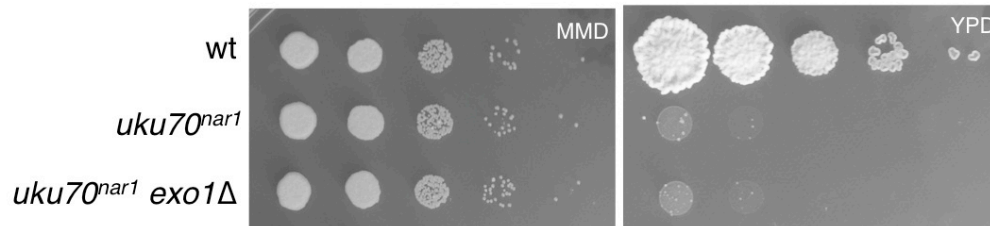

**Figure S6. Deletion of *exo1* does not suppress the essentiality of *uku70*.**

Serial tenfold dilutions of strain cultures carrying the indicated mutations were applied to solid rich medium (YPD) and minimal medium with nitrate (MMD). The YPD plates were incubated for 2 days and the nitrate plates for 4 days at 28°C.

## Figure S7

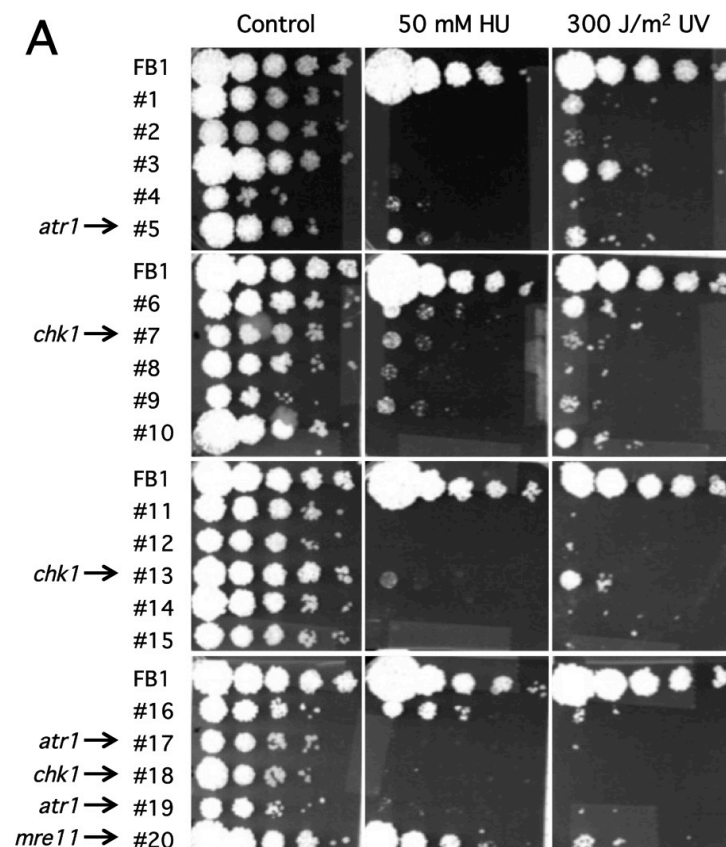

### Figure S7. Genetic screen for suppressors of Ku complex essentiality.

UCS33 strain carrying the *uku70<sup>nar1</sup>* allele was mutagenized using UV. 20 independent suppressors of Ku essentiality were spotted in restrictive conditions for *uku70<sup>nar1</sup>* expression in plates containing 50 mM HU or YPD plates and irradiated with 300J/m<sup>2</sup> of UV light. The majority of the isolated mutants showed hypersensitivity to at least one of these DNA damaging agents. Arrows on left side marked the strains in which plasmids carrying wild-type alleles of *chk1*, *atr1* or *mre11* were able to complement the DNA damage hypersensitive phenotype as well as the essentiality of Ku70.

## Figure S8

A

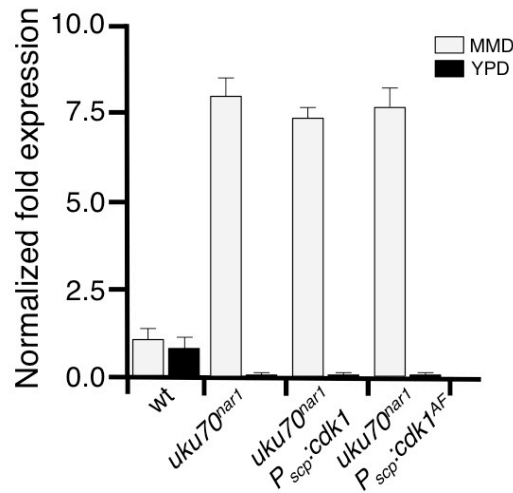

B

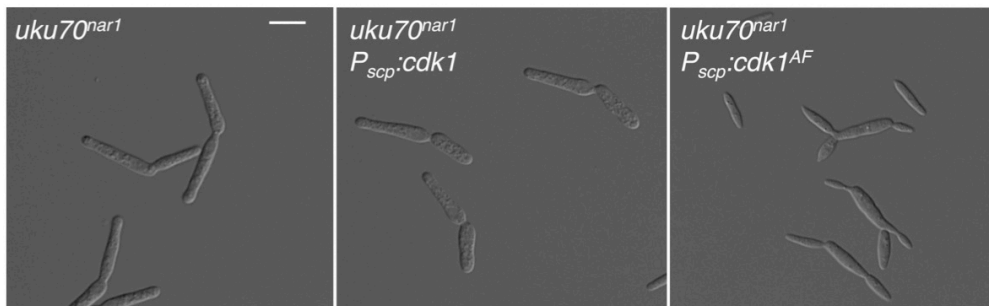

### Figure S8, Related to Figure 3

A. The levels of *uku70* mRNA in the respective conditional strains. The wild type FB1 and the conditional strains were grown for 8 hours in permissive (MMD) or restrictive conditions (YPD). Total RNA from each strain was extracted, and the *uku70* RNA level quantified as explained in Fig. S3.

B. Morphology of *uku70<sup>nar1</sup>* (UCS33), *uku70<sup>nar1</sup> P<sub>scp</sub>:cdk1* (UMP221) and *uku70<sup>nar1</sup> P<sub>scp</sub>:cdk1<sup>AF</sup>* (UMP222) cells incubated for 8 hours in restrictive conditions (YPD). All cells were shown at the same magnification, Bar: 15  $\mu$ m.

The presence of smaller, non-elongated cells in UMP222 is consistent with suppression of the G2 arrest phenotype.

## Figure S9

```

U_maydis_UM04704_ 1 MVRLTRRTGTQKSAQSQSQLNVVEEQDEQDELTSFSSQHQDKLQDEPGSRL
H_sap_Mre11      1 M-----
Sc_Mre11         1 M-----
S_pombe_Mre11   1 MPN-----

U_maydis_UM04704_ 51 PRAARRSTPTSAAPHDHHQQEV IQCDMEAAEAEAEVEAEAYDAHLPPSS
H_sap_Mre11      2 -----S
Sc_Mre11         2 -----
S_pombe_Mre11   4 -----DPSD

U_maydis_UM04704_ 101 TFAAQSDDHHTIMLATDNHGYMERDPVRCDSIRTFEELQLAVQHDV
H_sap_Mre11      3 TADATDDENTFKILVATDIHIGMEKDAVRGNDTFVTLDEILRLAQNENFV
Sc_Mre11         2 ---DYPDPDTINILITFDNHVGYNENDFITGDDSKTFHEVMLAANNV
S_pombe_Mre11   8 MNNELHNENTIFILISDIPHVGYGEKDPVRGNSFVTFNEILETARERDV

U_maydis_UM04704_ 151 DILLGGDLFHENKPSRDITLQTMALLRQYTI GDKPISVELLSDPNDGAL
H_sap_Mre11      53 DILLGGDLFHENKPSRKTLHTCLELLRKYCMGDPVQOFELSDQSY-NF
Sc_Mre11         49 DMVVQSGLDFHVNKPSKSLYQVLRRLRLCCGDKPCELELLSDPSQ-VF
S_pombe_Mre11   58 DMILLGGDIFHNKPSRKALYCALRSLRLNCCGDKPCELELLSDTST-TT

U_maydis_UM04704_ 201 PGKRFPAINNYEDPNLNVAIPVFSIHGNHDDPQGVGETGALSALDLSVSG
H_sap_Mre11      102 GFSKFPWVNYDGNLNTSIPVFSIHGNHDDPFGA---DALCALDILSCAG
Sc_Mre11         98 HIDEFTNINNYEDPNFNISIPVFGISGNHDDASGD---SLLCPMDILHATG
S_pombe_Mre11   107 GDTAVCNINNYLDPNINVAIPVFSIHGNHDDPSGD---GRYSALDILQVTG

U_maydis_UM04704_ 251 LNNYFGKTELPSDDAAAGAPAARTARGGAFQEKGIRIKPVLLQKGETLA
H_sap_Mre11      149 FVNHFGNS-----MSVEKIDLSPVLLQKGSTKLA
Sc_Mre11         145 LNNHFGKV-----IESDKIKVPLLQKGSTKLA
S_pombe_Mre11   154 LNNYEGEV-----PENNIVVSPILLQKGETKLA

U_maydis_UM04704_ 301 LYGMGNIKDERMHFELRANRVMYRPOEPPDSWFNLCVHQNFVAHNPKA
H_sap_Mre11      178 LYGLGSIPDERLYRMFVNKKVMTLRKEDENSWFNLEVIHQNFSKHGSTN
Sc_Mre11         174 LYGLAVRDERLFRIFKGGVTFEVPTMREGWFNLCVHQNHHTHTNTA
S_pombe_Mre11   183 LYGISNVRDERLYHSFRFNKVKFLRPLDLYRDEWFNLLTVHQNFSAHTPTS

U_maydis_UM04704_ 351 CVPETMDDSVHLVWGHEHQMIIPQSVIEKRYHITOPGSSVATSLSQG
H_sap_Mre11      228 FVPEQFLDDFDLVIWGHEHECKIAPTKNEQQLFYISQPGSSVVTSLSPG
Sc_Mre11         224 FLPEQFLPDFIDMVIWGHEHECTPNLVHNPIKNFDLQPGSSVATSLCEA
S_pombe_Mre11   233 YLPESFTQDFYDFVWGHEHECTIDGSYNPTQKFTVQPGSIVATSLSPG

U_maydis_UM04704_ 401 ETVEKCVAVVHVE-KTDFLEPIPLQTVRPFIMDDVLSSELYD--AGLS
H_sap_Mre11      278 EAVKKHVGILLIK-GKMNMHKIPLTVROEFMEDIVLANHPDFHFNPNP
Sc_Mre11         274 EAQPKYVFILDIKYGEAPKMTPIPLETTRTERMKSTISLQVPH---RF--
S_pombe_Mre11   283 ETAPKHCGILNIT-GNDFHEKIRLRTVTRPFIMKDIILSEVSSI--PPV

U_maydis_UM04704_ 448 SERGDVTKLLRKRVEGIIARAKREFOENY-----PRREMLPLVRLRV
H_sap_Mre11      327 KVTQAQSFCEKTEEMENAEERRLGN-----SHQPEKPLVRLRV
Sc_Mre11         320 HDKDATSKYLIEQVEEMIRDAEETKQLADDDGEGDMVAELPKPLVRLRV
S_pombe_Mre11   330 ENKKEVITYLISKVEEATEANAQVYEAQCTVPV-VENEKPLVRLRV

U_maydis_UM04704_ 491 EYTN-----QESNPQRFQEEFAGKVANPKEVQFTKRNLRSGRR
H_sap_Mre11      368 DYSGG-----TEPFSVLRFSQKFDVRVANPKDIHFHFRHEQKE--K
Sc_Mre11         370 DYSAPSNTQSPIDYQENPRRFSNRFVGRVANGNVQVQFYKKSPPV---R
S_pombe_Mre11   379 DYTGG-----YQTEPNQRFSNRFVGRVANATDVVQFYLKIKKYTRSK-

```

```

U_maydis_UM04704_  532  DQDESANGPSAYVDVEEGLLPVERLEKVDVGKLVVEYLQA----QILDI
H_sap_Mre11        408  TGEETINFGKLIITKPSE-----GTLRVEDLVKQYFQIAEKNVQLSL
Sc_Mre11           418  SKKSGI-NGSISDRVVEKL-FSESQGELEVQTLVNLLK----MQLSL
S_pombe_Mre11     420  -RNDG-LYTSAVEDIK-----INSLRVESLVNEYLKT----NRLEC

U_maydis_UM04704_  578  LNPEGLEGAVINFVVKDDRDAIDSEVTKMLKNTVKGCLVT-----IDPEES
H_sap_Mre11        449  LTERGMGEAVQEFVVKEEKDAIEELVKYQLEKTRFLKER---HIDALEE
Sc_Mre11           462  LPEVGLNEAVKKFVKDEKTAIKFESHEISNEVGILSTNEEFRLTDDAE
S_pombe_Mre11     455  LPEDSLGEAVINFVVKDDRDAIKECVETQLNKQINLVKKR-VTEINLEQ

U_maydis_UM04704_  623  RIDG---ELERIRQQQQQQRREMELEDMEEADQARRNAARG-NESDDSMMD
H_sap_Mre11        496  KIDE---EVRRFRETROKNTNEEDDEVREAMT-RARALRSQSEESASAFS
Sc_Mre11           512  EMKATIKQVHRANSVRPTPPK----ENDET-----NFAFN
S_pombe_Mre11     504  EISSLINDLPKISTTRKDYBELPEVSETSINIAEH-TPVLKHTSSLLD

U_maydis_UM04704_  669  DLERPAAVKPARRADRARKAAAAYQDDDEQDDFDDAS--IASGTRRMTN
H_sap_Mre11        542  ADDLSTIDLA-----EQMANDSDDSTSAATNKGRGRGRG
Sc_Mre11           543  GNGLDSFRSSN-----REVRTGSPDIQSHVDNESRITH
S_pombe_Mre11     553  HHSPATSSSE-----HEMEATPSPA LKK-----TN

U_maydis_UM04704_  717  RRGAASTTSASKARKTVAAAPRAPAAEAPAPART--SASTSRAAAPPTF
H_sap_Mre11        576  RRGERGQNSASRGGSQ--RGRADTGLETS--TRS--SNS--KTAVSASRN
Sc_Mre11           577  -----ISQAESSKPTSKPKRVRTATKKKIPAFSDSTV
S_pombe_Mre11     580  KRRE-----LSSSLTKKNTRTPORS--KEVKKV-----

U_maydis_UM04704_  765  I-GPE SAYA-EPDEESDVAIDASTPAPSATRGHASVLDLIG---KQSAT
H_sap_Mre11        618  M-----SLIDAFKSTROQSR
Sc_Mre11           609  ISDAENELGDNNDQDDVDLDNDIIMVSTDEEDASYGLNIG---PKTKT
S_pombe_Mre11     606  -----PAR

U_maydis_UM04704_  810  SKTTKGRGKTVASTASARSAPTQPPTAQRSRQRQPQ-----ESI--QA
H_sap_Mre11        634  NYTTKNYSEVVEVDES DVEEDIFPTTSKIDQRWSSSTSSSKIMSQSQVSKG
Sc_Mre11           656  KTRP-----AAST--K--TASRRCKG
S_pombe_Mre11     609  KI-----SQSTKKS DKNTQSTLLFYDESSSTTEAQY

U_maydis_UM04704_  850  SDDDEDAIVDEDDGDEIEPEQTTTRTAGRRAGRR
H_sap_Mre11        684  VDFE-SS-EDDDDF-----MNTSSLRNRNRR
Sc_Mre11           673  RASR-TP---K-TD-----ILGSLLAKRK
S_pombe_Mre11     639  LDNEE-----DEI-----L-----DD

```

**Figure S9. *U. maydis* Mre11**

A multiple sequence alignment of Mre11 from *S. cerevisiae*, *S. pombe* and humans with the hypothetical *U. maydis* UM04704 protein. Identical amino acids are indicated in black boxes while conservative changes are indicated in gray boxes. The conserved histidine residue in nuclease motif III is highlighted in a red box.



## Figure S10

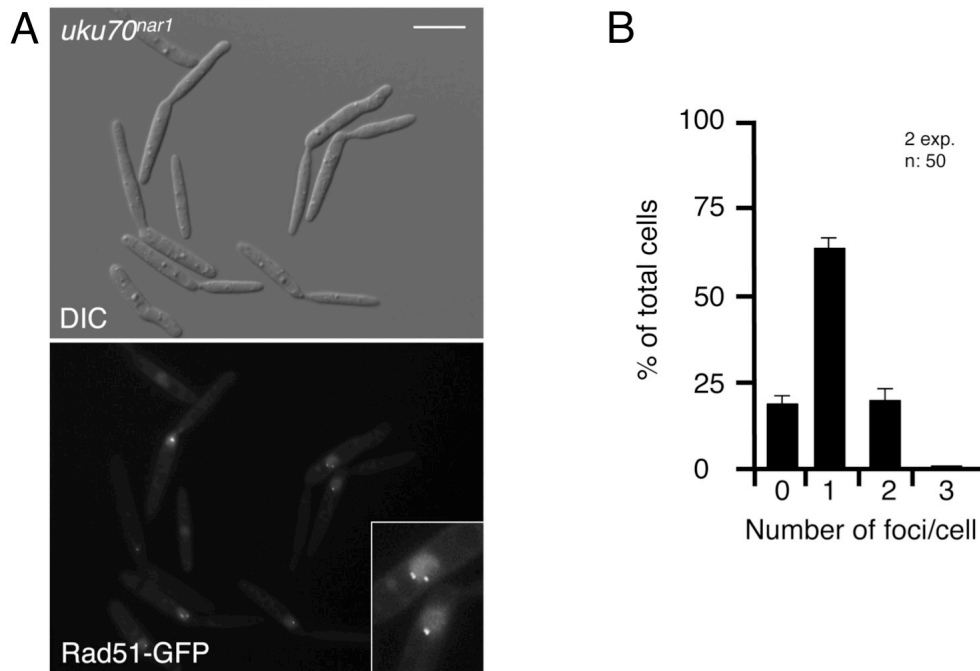

### Figure S10. Formation of Rad51-GFP foci in Ku70-depleted cells.

A. Images of UCS33 cells carrying a Rad51-GFP fusion as well as the *uku70<sup>nar1</sup>* allele after 8h of incubation in restrictive conditions for *uku70<sup>nar1</sup>* expression. Bar: 10  $\mu$ m. Inset shows a magnification of selected nuclei.

B. Quantification of cells showing punctate Rad51-GFP foci.

**Figure S11**

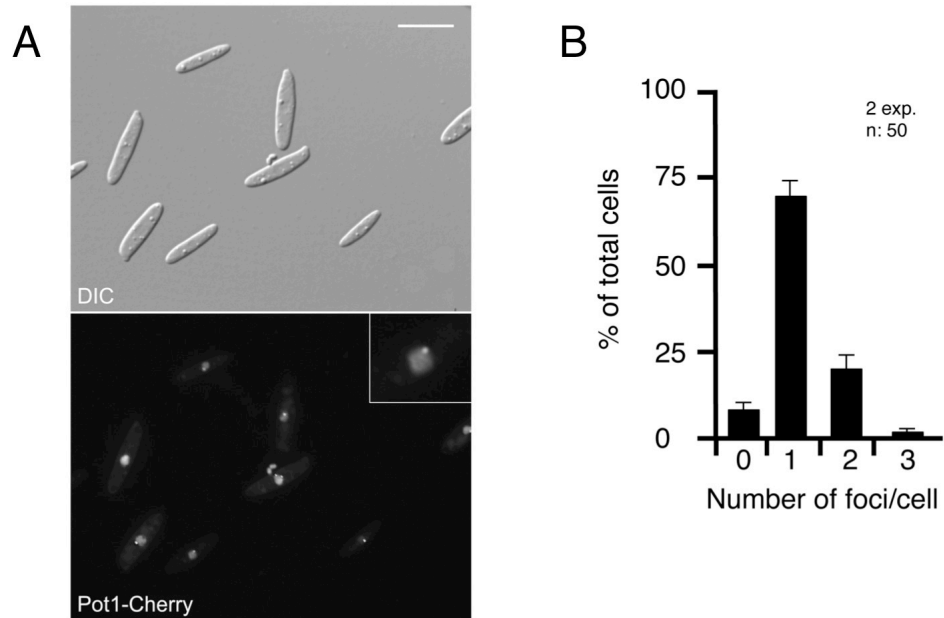

**Figure S11. Pot1-cherry as a telomeric marker in *U. maydis*.**

A. Images of UMP192 cells carrying a Pot1-cherry fusion grown until the mid-exponential phase in YPD. Bar: 10  $\mu$ m. Inset shows a magnification of a selected nucleus.

B. Quantification of cells showing Pot1-cherry foci.

Figure S12

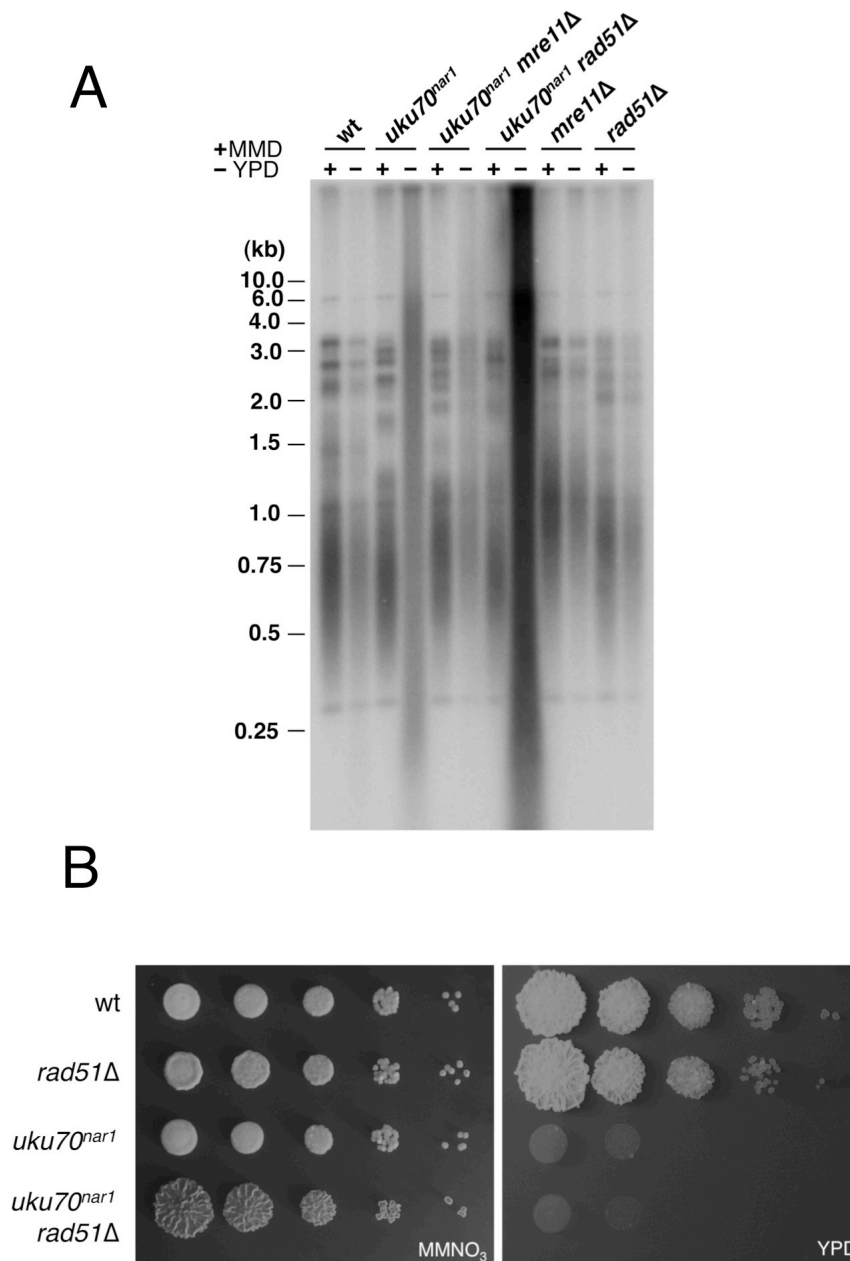

**Figure S12. Rad51 does not suppress the essentiality of Ku70**

A. DNAs from the indicated strains (FB1 (WT), UCS33 (*uku70<sup>nar1</sup>*), UMP218 (*uku70<sup>nar1</sup> mre11Δ*), UMP215 (*uku70<sup>nar1</sup> rad51Δ*), UMP219 (*mre11Δ*), and

UMP214 (*rad51Δ*) grown in restrictive (-, YPD) or permissive (+, MMD) conditions for 18 h were isolated, digested with *Pst*I, and hybridized with a radioactively labeled telomere-specific probe.

B. Serial tenfold dilutions of FB1 (WT), UMP214 (*rad51Δ*), UCS33 (*uku70<sup>nar1</sup>*), and UMP215 (*uku70<sup>nar1</sup> rad51Δ*) cultures were applied to solid rich medium (YPD) and minimal medium with nitrate (MMD). The YPD plates were incubated for 2 days and the nitrate plates for 4 days at 28°C.

**Figure S13**

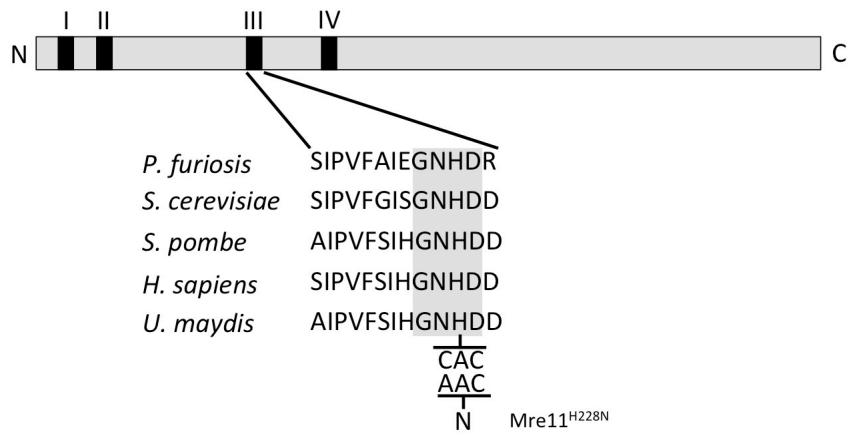

**Figure S13. Alignment of the Mre11 nuclease motif IIIs in five different homologues.**

Invariant residues are highlighted. The histidine-to-asparagine change (H228N) is depicted below the active-site histidine.

## SUPPLEMENTARY TABLES

**Table S1.** *U. maydis* strains used in this study

| Strain | Relevant genotype                                                   | Source    |
|--------|---------------------------------------------------------------------|-----------|
| FB1    | <i>a1 b1</i>                                                        | (1)       |
| UCS30  | <i>a1 b1 uku80<sup>nar1</sup></i>                                   | this work |
| UCS33  | <i>a1 b1 uku70<sup>nar1</sup></i>                                   | this work |
| UMP132 | <i>a1 b1 cut11-cherry</i>                                           | (2)       |
| UCS37  | <i>a1 b1 uku80<sup>nar1</sup> cut11-cherry</i>                      | this work |
| UCS34  | <i>a1 b1 uku70<sup>nar1</sup> cut11-cherry</i>                      | this work |
| UMP122 | <i>a1b1 chk1Δ</i>                                                   | (3)       |
| UCS39  | <i>a1 b1 uku80<sup>nar1</sup> chk1Δ</i>                             | this work |
| UCS35  | <i>a1 b1 uku70<sup>nar1</sup> chk1Δ</i>                             | this work |
| UCS1   | <i>a1b1 atr1Δ</i>                                                   | (4)       |
| UCS44  | <i>a1 b1 uku80<sup>nar1</sup> atr1Δ</i>                             | this work |
| UCS40  | <i>a1 b1 uku70<sup>nar1</sup> atr1Δ</i>                             | this work |
| UMP111 | <i>a1 b1 chk1-3GFP</i>                                              | (3)       |
| UCS43  | <i>a1 b1 uku80<sup>nar1</sup> chk1-3GFP</i>                         | this work |
| UCS42  | <i>a1 b1 uku70<sup>nar1</sup> chk1-3GFP</i>                         | this work |
| UMP124 | <i>a1 b1 chk1-3MYC</i>                                              | (3)       |
| UMP231 | <i>a1 b1 uku70<sup>nar1</sup> chk1-3MYC</i>                         | this work |
| UMP221 | <i>a1 b1 uku70<sup>nar1</sup> P<sub>scp</sub>:cdk1</i>              | this work |
| UMP222 | <i>a1 b1 uku70<sup>nar1</sup> P<sub>scp</sub>:cdk1<sup>AF</sup></i> | this work |
| UMP210 | <i>a1b1 rec1Δ</i>                                                   | this work |
| UMP219 | <i>a1b1 mre11Δ</i>                                                  | this work |
| UMP220 | <i>a1b1 uku70<sup>nar1</sup> rec1Δ</i>                              | this work |
| UMP218 | <i>a1b1 uku70<sup>nar1</sup> mre11Δ</i>                             | this work |

|        |                                                                             |           |
|--------|-----------------------------------------------------------------------------|-----------|
| UMP223 | <i>a1 b1 uku70<sup>nar1</sup> rec1Δ chk1-3GFP</i>                           | this work |
| UMP224 | <i>a1 b1 uku70<sup>nar1</sup> mre11Δ chk1-3GFP</i>                          | this work |
| UMP228 | <i>a1 b1 uku70<sup>nar1</sup> mre11Δ chk1-3MYC</i>                          | this work |
| UMP186 | <i>a1 b1 rad51-GFP</i>                                                      | (2)       |
| UCS33  | <i>a1 b1 uku70<sup>nar1</sup> rad51-GFP</i>                                 | this work |
| UCS41  | <i>a1 b1 uku80<sup>nar1</sup> rad51-GFP</i>                                 | this work |
| UMP192 | <i>a1 b1 pot1-cherry</i>                                                    | this work |
| UCS57  | <i>a1 b1 rad51-GFP pot1-cherry</i>                                          | this work |
| UCS45  | <i>a1 b1 uku70<sup>nar1</sup> rad51-GFP pot1-cherry</i>                     | this work |
| UCS46  | <i>a1 b1 uku80<sup>nar1</sup> rad51-GFP pot1-cherry</i>                     | this work |
| UMP214 | <i>a1b1 rad51Δ</i>                                                          | this work |
| UMP215 | <i>a1b1 uku70<sup>nar1</sup> rad51Δ</i>                                     | this work |
| UMP235 | <i>a1b1 uku70<sup>nar1</sup> mre11Δ cbx:mre11</i>                           | this work |
| UMP236 | <i>a1b1 uku70<sup>nar1</sup> mre11Δ cbx:mre11<sup>H228N</sup></i>           | this work |
| UMP237 | <i>a1b1 uku70<sup>nar1</sup> mre11Δ cbx:mre11 chk1-3MYC</i>                 | this work |
| UMP238 | <i>a1b1 uku70<sup>nar1</sup> mre11Δ cbx:mre11<sup>H228N</sup> chk1-3MYC</i> | this work |
| UMP230 | <i>a1 b1 mre11-GFP pot1-cherry</i>                                          | this work |
| UMP231 | <i>a1 b1 uku70<sup>nar1</sup> mre11-GFP pot1-cherry</i>                     | this work |
| UMP234 | <i>a1 b1 uku70<sup>nar1</sup> mre11-GFP pot1-cherry chk1Δ</i>               | this work |
| UMP232 | <i>a1 b1 mre11-3HA</i>                                                      | this work |
| UMP233 | <i>a1 b1 uku70<sup>nar1</sup> mre11-3HA</i>                                 | this work |
| UMP279 | <i>a1 a2 b1 b2 uku70 uku70Δ</i>                                             | this work |
| UMP280 | <i>a1 a2 b1 b2 uku80 uku80Δ</i>                                             | this work |
| UMP281 | <i>a1b1 uku70<sup>nar1</sup> exo1Δ</i>                                      | this work |

1. Banuett, F., and Herskowitz, I. (1989). Different *a* alleles of *Ustilago maydis* are necessary for maintenance of filamentous growth but not for meiosis. *Proc Natl Acad Sci U S A* **86**, 5878-5882.

2. Mielnichuk, N., Sgarlata, C., and Perez-Martin, J. (2009). A role for the DNA-damage checkpoint kinase Chk1 in the virulence program of the fungus *Ustilago maydis*. *J Cell Sci* **122**, 4130-4140.
3. Perez-Martin, J. (2009). DNA-damage response in the basidiomycete fungus *Ustilago maydis* relies in a sole Chk1-like kinase. *DNA Repair* **8**, 720-731.
4. de Sena-Tomas, C., Fernandez-Alvarez, A., Holloman, W.K., and Perez-Martin, J. (2011). The DNA damage response signaling cascade regulates proliferation of the phytopathogenic fungus *Ustilago maydis* in planta. *Plant Cell* **23**, 1654-1665.



**Table S2.** Oligonucleotide primers used in this study

| <b>Name</b>                     | <b>Sequence 5'-3'</b>                          |
|---------------------------------|------------------------------------------------|
| <i>uku80</i> conditional allele |                                                |
| Ku80-2                          | TTAATTAAAGCGACACAGAGGCCAATAATGGTC              |
| Ku80-3                          | GAATTCATGCGGATGTGGCGGCCATGACAAGGG              |
| Ku80-4                          | CATATGAGTGTCTGAATCCAACACGCTCACGCTC             |
| Ku80-5                          | TTAATTAACGGGGGCTACAGGTGTCGAGGTGGG              |
| <i>uku70</i> conditional allele |                                                |
| Ku70-2                          | TTAATTAACGGGCAAACCTTGCAGCCTCAACCT              |
| Ku70-3                          | CAATTGAATACCGCACAAAGTTGGAGTATGTGGC             |
| Ku70-4                          | CATATGCCCAAGGCTTACTTTGTCAACAAGCGC              |
| Ku70-5                          | TTAATTAACACAACACGTTTGGGTGTCTCGCGC              |
| <i>mre11</i> deletion allele    |                                                |
| Mre11-2                         | GCTTAATTAATATTTGCCTGTTGTCTGTGCGTTGAGAACG       |
| Mre11-3                         | GGTGGCCATCTAGGCCTCGCTTGCTCGCACGAAATCAAAGTAGATA |
| Mre11-4                         | GGTGGCCTGAGTGGCCGATTCAGCGAGTCGGCCAAGATGGTGGAGA |
| Mre11-5                         | GCTTAATTAATAATATCCAGCTGGCTTCGACATTCGACCAA      |
| <i>rec1</i> deletion allele     |                                                |
| Rec1-2                          | GCTTAATTAAGCTGGAACCTCACTCTGCTCTAGCTC           |
| Rec1-3                          | GGTGGCCATCTAGGCCGGCATGCTGACGGTGGCGTCAACTGG     |

Rec1-4 ATAGGCCTGAGTGGCCTTGCGCAATCGCCGCTGAAGTTGATC

Rec1-5 GGTTAATTAATCGAGTTGGCCTTCTTGTCTGCTGCA

*rad51* deletion allele

Rad51-2 GCTTAATTAACATGGCTTCACCCCGCGGCTCTCCCT

Rad51-3 GGTGGCCATCTAGGCCAGAGTGTCCGAAGGACAGTTTTACAGGTT

Rad51-4 ATAGGCCTGAGTGGCCGTCATCCTGCTCCTACTCTTGCTCGCAGC

Rad51-5 GCTTAATTAAGGTGCGCTCTAGGTGAAGCTTGTTGC

*exo1* deletion allele

Exo1-2 CTAGGTCTCGCCTGCGTTTTAAACAAGATCAAGCGAATGTCAGCGAT

Exo1-3 CTAGGTCTCCAGGCCGCGGTGCAGGCCGAAGGCGTTACAAG

Exo1-4 TAGGGTCTCCGGCCCTGAAGGGTCTGCAGGTAATAGGCAGC

Exo1-5 CTAGGTCTCGCTGCGTTTTAACTGGACAGAGGGAAGATGGAGAAA

*pot1-cherry* allele

Pot1-2 TTAATTAAGACAGGAGACATCATCCGCATCCAA

Pot1-3 GGTGGCCGCGTTGGCCAATAGATCGTGTTGTCAGATAGAACGTT

Pot1-4 ATAGGCCTGAGTGGCCAGACCCGAGGATGAATAACATTCCAGTTC

Pot1-5 TTAATTAAGGTGGCCTCTCGAACCGCCCGAGAA

*mre11-3GFP* allele

Mre11-GFP1 GCGACCAGGACGAGAGCGCCAACGGACCAA

Mre11-GFP2 GCTTAATTAAGAGGAAGGCCTGCTGCCGGTCTCGAACG

Mre11-GFP3 GGTGGCCGCGTTGGCCCGCCGTCCAGCCCGTCGCCAGCAGTCCG

Mre11-GFP4 ATAGGCCTGAGTGGCCAACGTGGAACACGAACCGCGCTGCGCAAC

*mre11-nd* allele

Mre11-1 AGCTGATTCGTGAAATCGTGAATCC

Mre11nd-1 GTCTCTCCGACACCTTGGGGATCGTCGTTATTGCCGTGGATCGAA

Mre11nd-2 TTCGATCCACGGCAATAACGACGATCCCCAAGGTGTCGGAGAGAC

Mre11-6 CGTCCAACCTGCAAGAAGCCGCAGC
